# Supplementary material for: Gene Ontology Meta Annotator for Plants (GOMAP)
Source: PubMed Central journal article supplement (PMC8146647; doi:10.1186/s13007-021-00754-1), 2021-05-25
Supplement: 13007_2021_754_MOESM1_ESM.pdf [file 13007_2021_754_MOESM1_ESM.pdf]

# GOMAP Supplemental Data

Kokulapalan Wimalanathan

2/23/2021

## Supplemental Tables

Table ST1: Location of input fasta files for the maize lines

| Inbred Line | Link                                                                                                                                                                                                                |
|-------------|---------------------------------------------------------------------------------------------------------------------------------------------------------------------------------------------------------------------|
| B73v4       | <a href="ftp://ftp.ensemblgenomes.org/pub/plants/release-32/fasta/zea_mays/pep/Zea_mays.AGPv4.pep.all.fa.gz">ftp://ftp.ensemblgenomes.org/pub/plants/release-32/fasta/zea_mays/pep/Zea_mays.AGPv4.pep.all.fa.gz</a> |
| B73v3       | <a href="https://ftp.maizegdb.orgGDB/FTP/B73_RefGen_v3/Zea_mays.AGPv3.22.pep.all.fa.gz">https://ftp.maizegdb.orgGDB/FTP/B73_RefGen_v3/Zea_mays.AGPv3.22.pep.all.fa.gz</a>                                           |
| Mo17        | <a href="https://ftp.maizegdb.orgGDB/FTP/Zm-Mo17-REFERENCE-CAU-1.0/Zm00014a.proteins.fa.gz">https://ftp.maizegdb.orgGDB/FTP/Zm-Mo17-REFERENCE-CAU-1.0/Zm00014a.proteins.fa.gz</a>                                   |
| PH207       | <a href="https://ftp.maizegdb.orgGDB/FTP/Zm-PH207-REFERENCE_NS-UIUC_UMN-1.0/Zm00008a.protein.fa.gz">https://ftp.maizegdb.orgGDB/FTP/Zm-PH207-REFERENCE_NS-UIUC_UMN-1.0/Zm00008a.protein.fa.gz</a>                   |
| W22         | <a href="https://ftp.maizegdb.orgGDB/FTP/Zm-W22-REFERENCE-NRGENE-2.0/Zm00004b.protein.fa.gz">https://ftp.maizegdb.orgGDB/FTP/Zm-W22-REFERENCE-NRGENE-2.0/Zm00004b.protein.fa.gz</a>                                 |

Table ST2: Comparison of GOMAP Annotations and Plant-Specific Subset

| inbred | source    | Cellular Component |                | Molecular Function |                | Biological Process |                |
|--------|-----------|--------------------|----------------|--------------------|----------------|--------------------|----------------|
|        |           | All                | Plant-specific | All                | Plant-specific | All                | Plant-specific |
| B73v3  | GOMAP     | 135,251            | 133,272        | 87,953             | 87,267         | 291,855            | 287,199        |
| B73v4  | Community | 35,771             | 35,764         | 49,659             | 49,685         | 44,998             | 45,016         |
| B73v4  | GOMAP     | 88,831             | 87,683         | 82,849             | 81,906         | 278,952            | 270,146        |
| Mo17   | GOMAP     | 87,573             | 86,482         | 79,755             | 78,892         | 278,043            | 269,274        |
| PH207  | Community | 4,429              | 4,428          | 23,192             | 23,219         | 13,093             | 13,081         |
| PH207  | GOMAP     | 90,625             | 89,511         | 86,106             | 85,151         | 288,937            | 278,278        |
| W22    | GOMAP     | 95,397             | 94,271         | 85,616             | 84,699         | 290,032            | 280,705        |

Figure S1: Distribution of Specificity for the maize annotations from community and GOMAP

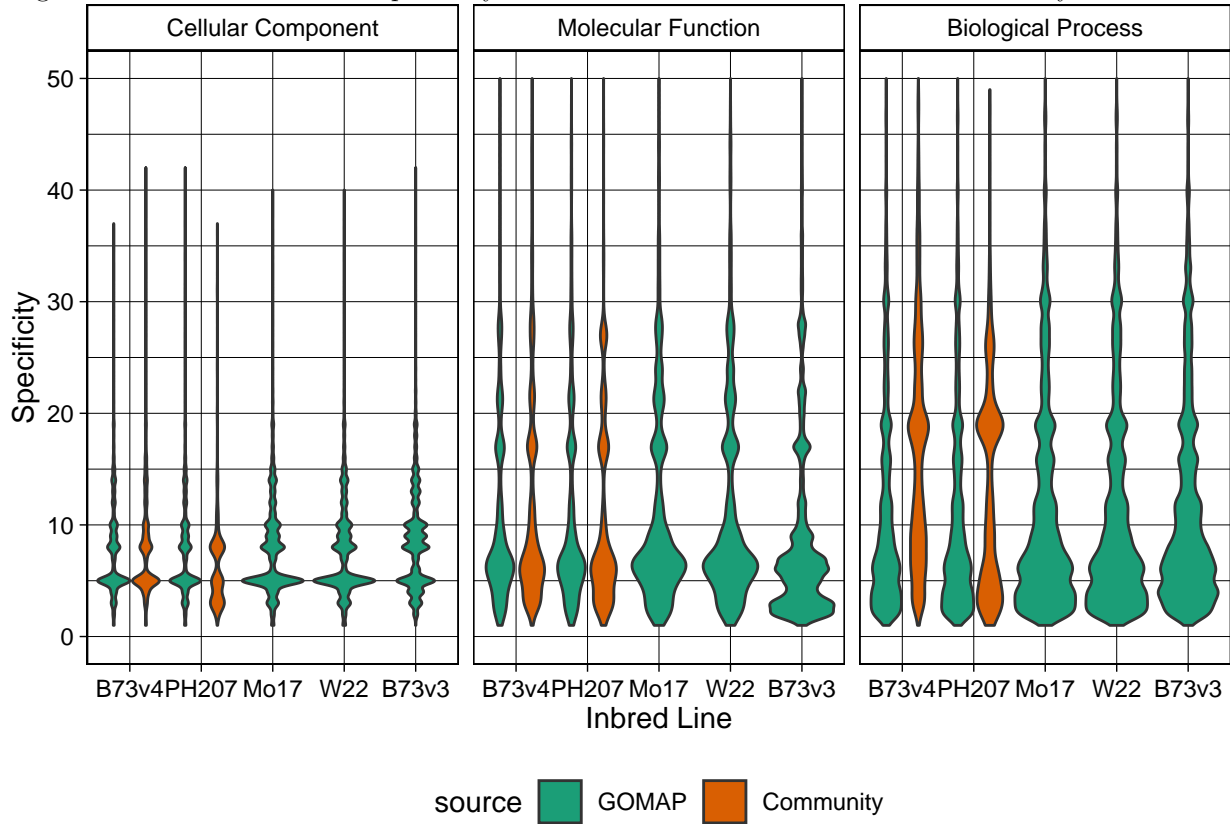

Left column: Cellular Component. Middle column: Molecular Function. Right column: Biological Process. Inbred lines are denoted along the x-axis. The specificity is denoted along y-axis, and the range is limited to less than 50. GOMAP annotations are denoted by green color. Community annotations are denoted by a orange color. The width of the plot along the y-axis indicates the proportion of the annotations that particular specificity value.

Figure S2: Distribution of Specificity for the genes that are shared between community and GOMAP

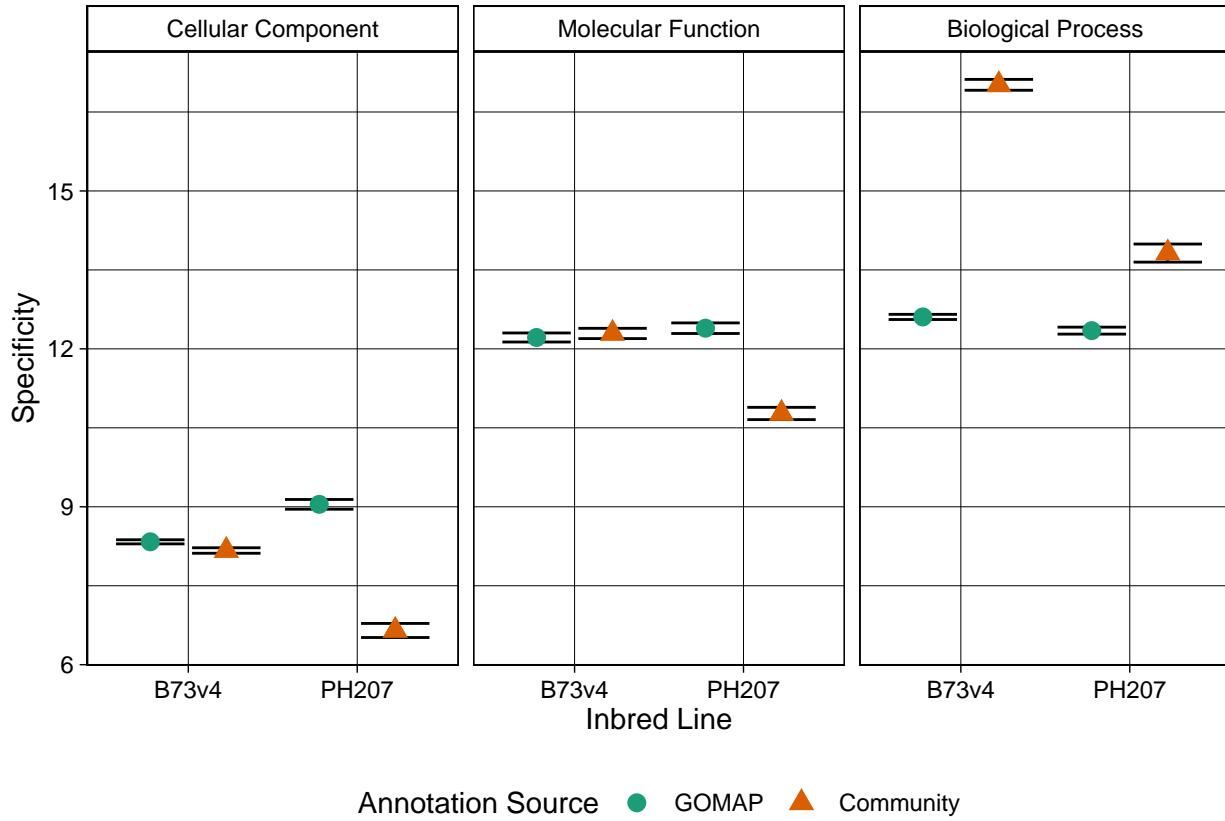

Left column: Cellular Component. Middle column: Molecular Function. Right column: Biological Process. Inbred lines are denoted along the x-axis. The specificity is denoted along y-axis, and the range is limited to less than 50. GOMAP annotations are denoted by green color. Community annotations are denoted by a orange color. The width of the plot along the y-axis indicates the proportion of the annotations that particular specificity value.
